# Supplementary material
Source: PubMed Central journal article supplement (PMC2660638)
Supplement: tpc.108.059576_1.pdf [file tpc.108.059576_1.pdf]

Supplemental Data. de Lorenzo et al. (2009). A novel plant LRR receptor kinase regulates the response of *Medicago truncatula* roots to salt stress

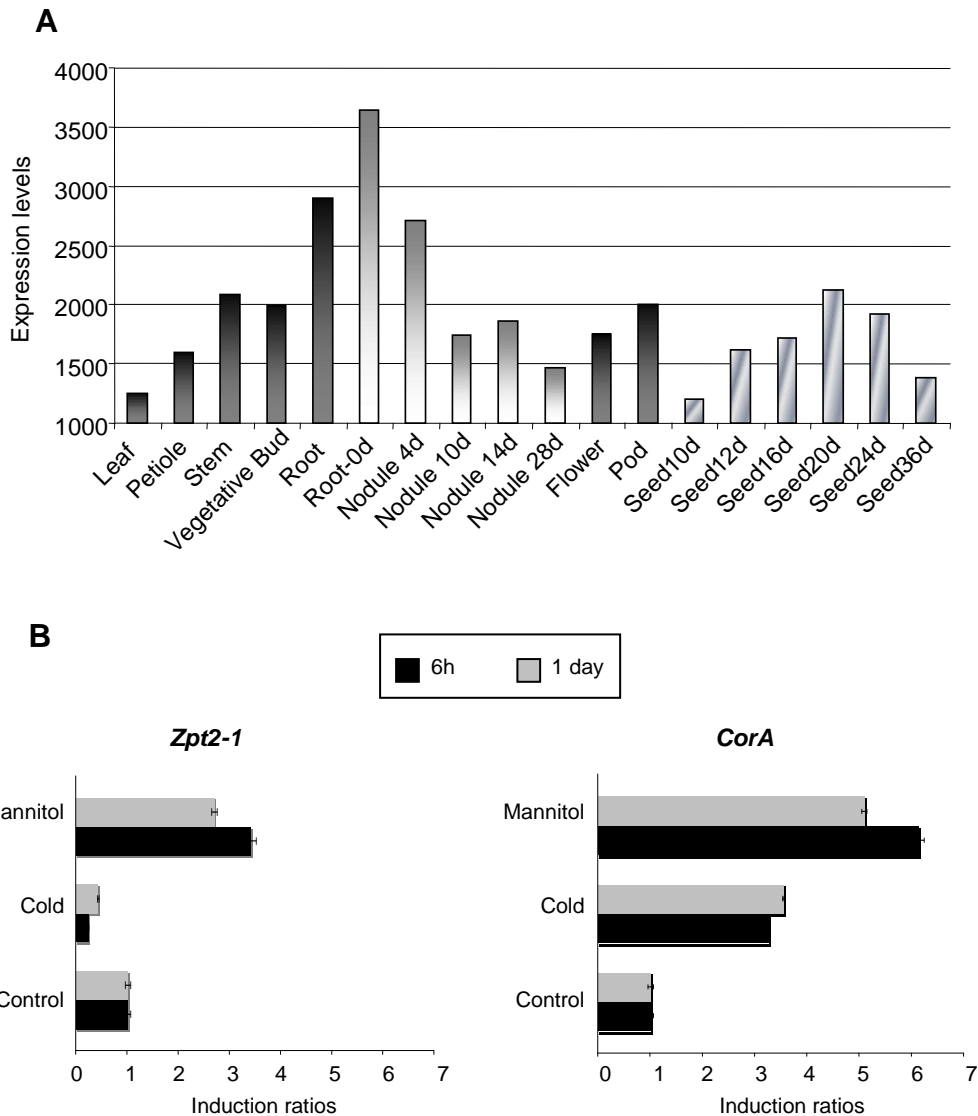

**Supplemental Figure 1. (A)** Expression levels of *Srlk* gene in *Medicago* organs (roots, nodules, stems, petioles, leaves, vegetative buds, flowers, seeds and seed pods) with detailed developmental time-series for nodules and seeds. Expression data was obtained from the *Medicago truncatula* Transcriptome Investigator (MtTI) Web Server (<http://bioinfo.noble.org/gene-atlas/>) using the gene expression atlas for *Medicago truncatula* based on Affymetrix *Medicago* Gene Chip® Genome Array as described by Benedito et al. (2008). **(B)** Expression levels of *Zpt2-1* (left chart) and *CorA* (right chart) genes in response to mannitol and cold stress (300 mM and 4 °C, respectively). *M. truncatula* Jemalong A17 roots (4-days grown) were transferred to each stress-induced medium for different times. Real time RT-PCR analysis of *Zpt2-1* and *CorA* expression in roots at 0, 6 h, and 1 day of treatment is shown. Histogram represents quantification of specific PCR amplification products for these genes normalised against the constitutive control *actin11*. Numbers on the X-axis indicate fold-induction of gene expression. A representative example out of two biological experiments is shown, and error bars represent standard deviation between three technical replicates.

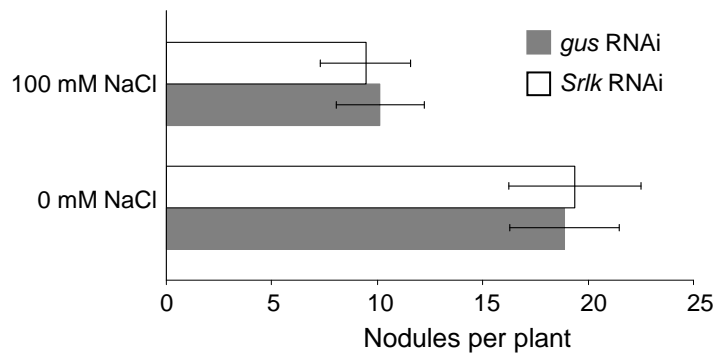

**Supplemental Figure 2. Evaluation of nodulation capacity of transgenic *gus*-RNAi and *Srlk*-RNAi *M. truncatula* roots.** Total number of nodules per plant observed 21 d.p.i. with *S. meliloti* 2011 in *M. truncatula* roots expressing *gus*-RNAi and *Srlk*-RNAi constructs. Nodule numbers were determined in composite plants grown in control (0 mM of NaCl) or in salt-stress conditions (100 mM of NaCl). The Student's t-test has been used,  $P < 0,001$  and  $n > 30$ .

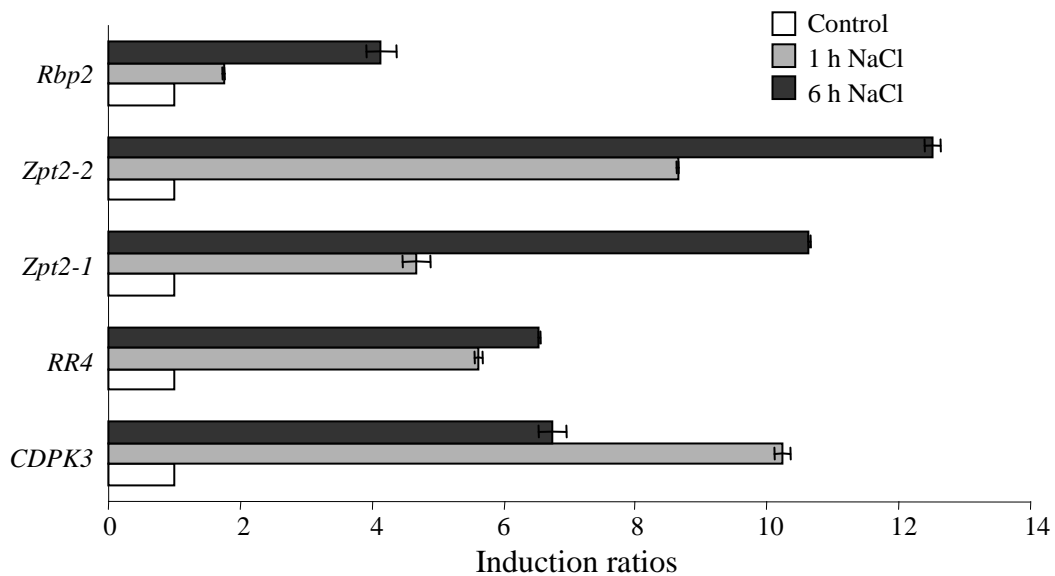

**Supplemental Figure 3. Expression levels of different salt-related genes in response to short-term salinity treatments.** The *M. truncatula* Jemalong A17 roots were grown in low-nitrogen liquid medium without salt for 4 days, and then transferred to the same medium supplemented with 150 mM of salt during different times. Real time RT-PCR analysis of *CDPK3*, *RR4*, *Zpt2-1*, *Zpt2-2* and *Rbp2* expression in roots at 0, 1 and 6h of treatment is shown. Histogram represents quantification of specific PCR amplification products for these genes normalised against the constitutive control *actin11*. Numbers above the X-axis scale indicate fold-induction of gene expression. The value of untreated roots (t = 0) was set to 1 as reference. A representative example out of two biological experiments is shown, and error bars represent standard deviation of three technical replicates.

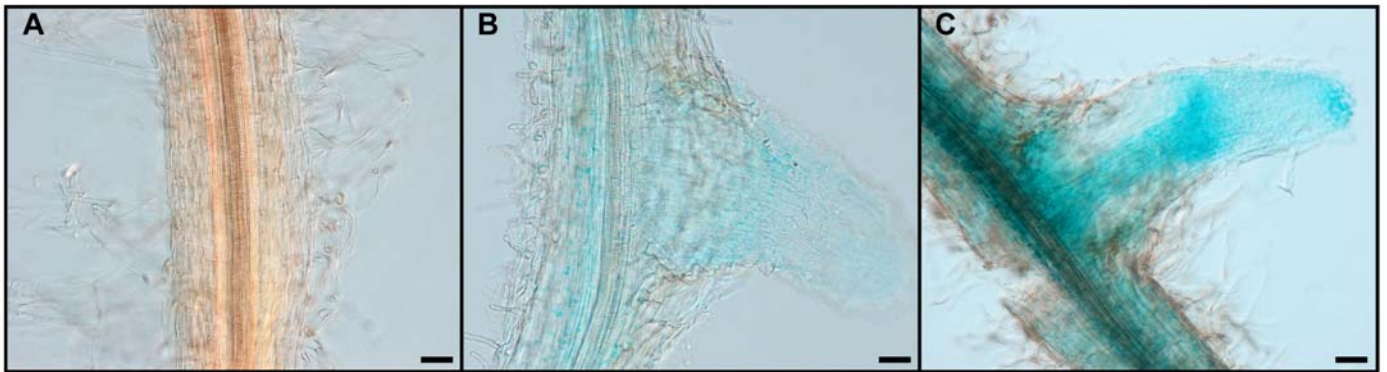

**Supplemental Figure 4.** Whole mount stainings to show Expression of the *MtSrlk* promoter in lateral root apices with or without salt (C and B, respectively) as well as a control carrying the vector without promoter (A). Scale Bars: 500  $\mu$ m.

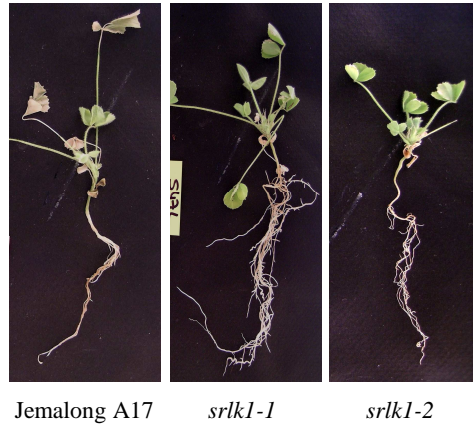

**Supplemental Figure 5. Effect of a long term NaCl treatment on *M. truncatula* Jemalong A17 and two mutant of *Srlk*.** Five days-old plants of the two *Srlk* mutants and Jemalong A17 were grown in the presence of 0 and 100 mM of NaCl in an *in vivo* system. Representative pictures from *M. truncatula* Jemalong A17 and, *srlk1-1* and *srlk1-2* homozygous mutants taken 12 days after treatment with 100 mM of NaCl in growth chamber.

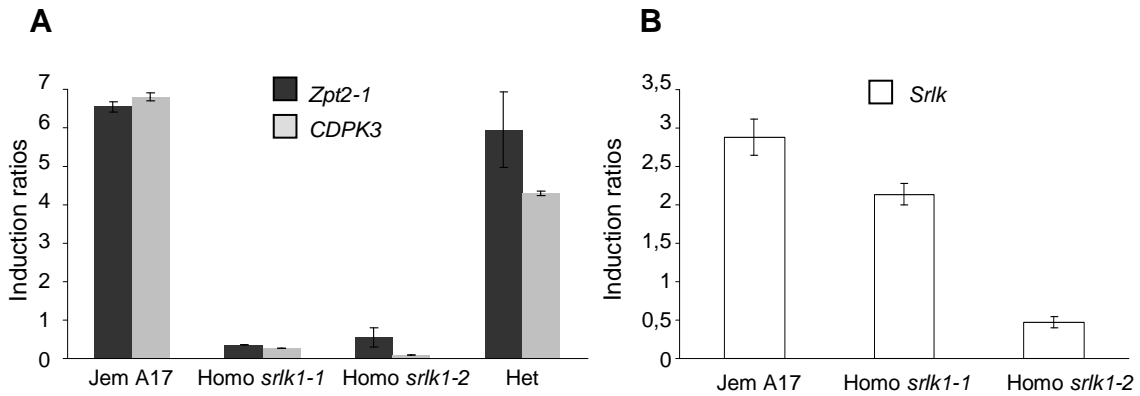

**Supplemental Figure 6. Expression of salt-regulated genes in *SrIk* mutants in salt stress condition.**

Effect of *SrIk* mutation on the expression of early induced salt-responsive genes was determined in leaves treated with 150 mM NaCl during 6 h. RNA samples from *srIk1-1* and *srIk1-2* homozygous lines and their corresponding Jemalong A17 plant or heterozygous lines (control plants), respectively, were analysed by Q-RT-PCR. Histograms represent the expression levels of each gene in TILLING lines in relation to the control plants. The genes studied were *CDPK3* and *Zpt2-1* in salt stress conditions **(A)**, and the expression levels of *SrIk* were also verified in the same condition **(B)**. Values were normalised against the actin gene.

**Supplemental Table 1. Sequences of oligonucleotides used for PCR and Quantitative RT-PCR.**

| Sequence name        | Forward primer                                        | Reverse primer                                       |
|----------------------|-------------------------------------------------------|------------------------------------------------------|
| <i>Srlk</i> promoter | <u>GGGGATCCTGGT</u> TTTGGAGTTAAAGGGTTG                | <u>GGAATTCTCTAGAGGTACATCCATTTGTGTGTGAG</u>           |
| <i>Srlk</i> cDNA     | <i>MtSrlkA</i> F:<br>TACCTTCCTTCTCCTCACAC             | <i>MtSrlkA</i> R:<br>CCATACACATCCCCTTTC              |
|                      | <i>MtSrlkB</i> F:<br>CATTGCTCGTGCAGAAAGATA            | <i>MtSrlkB</i> R:<br>CAAGGGAAATTCGTCATCGT            |
| <i>Srlk</i> LC       | TTCGCTTTCTGGGTCACTTT                                  | AACTCCAAACCCAAGACACG                                 |
| <i>Srlk</i> RNAi     | GGGGACAAGTTTGTACAAAAAAGCAGGC<br>TTTCGCTTTCTGGGTCACTTT | GGGGACCCTTTGTACAAGAAAGCTGGGT<br>AACTCCAAACCCAAGACACG |
| <i>Zpt2-1</i>        | AAGTCCGAAAAGCCGGGAGG                                  | GCACTTAACTCACCCACCACTGC                              |
| <i>Zpt2-2</i>        | GGCAACGGACTTTCTACCTC                                  | CTCCTCCATCAGCCACCGTG                                 |
| <i>Rbp2</i>          | GGTTGATAGAGTTATGAAGCGTG                               | CAAAAACCTGGAGGCTCTTGC                                |
| <i>RR4</i>           | GCTGAAGTTCACATGCCTGA                                  | CAGCTCCACAGACCAAACAA                                 |
| <i>UidA</i> (GUS)    | GGCCAGCGTATCGTGCTGCG                                  | GGTCGTGCACCATCAGCAGC                                 |
| <i>CDPK3</i>         | AGCATAAAGCAATCCAGT                                    | ACCAACCAAGCCTTCA                                     |

\* The bases underlined in the primers sequences correspond to substitutions in the genomic sequence.
